# Supplementary material
Source: PubMed Central journal article supplement (PMC4149857)
Supplement: NIHMS600440-supplement-01.pdf [file NIHMS600440-supplement-01.pdf]

Supplementary Table 1. Univariate analysis of association between maternal variables and neonatal body composition

| Maternal Variables   | <u>Neonatal Lean Body Mass</u> |                |                 | <u>Neonatal Fat Mass</u> |                |                | <u>Neonatal % Body Fat</u> |                |                |
|----------------------|--------------------------------|----------------|-----------------|--------------------------|----------------|----------------|----------------------------|----------------|----------------|
|                      | All                            | Males          | Females         | All                      | Males          | Females        | All                        | Males          | Females        |
| Parity               | -0.0544                        | -0.0827        | -0.0346         | -0.0008                  | -0.0614        | 0.0577         | 0.0392                     | -0.0366        | 0.0991         |
| Gestational Age      | <b>0.1964*</b>                 | <b>0.2122*</b> | <b>0.1965*</b>  | <b>0.1501*</b>           | <b>0.1636*</b> | 0.1338         | <b>0.1271*</b>             | <b>0.1540*</b> | 0.0916         |
| Age                  | <b>0.1540*</b>                 | <b>0.1486*</b> | 0.1281          | 0.0903                   | 0.11           | 0.0522         | 0.0556                     | 0.0821         | 0.0211         |
| Pre-pregnancy Weight | <b>0.1276*</b>                 | <b>0.2079*</b> | 0.0593          | <b>0.1522*</b>           | <b>0.2457*</b> | 0.0358         | <b>0.1554*</b>             | <b>0.2423*</b> | 0.0512         |
| Height               | <b>0.1956*</b>                 | <b>0.2193*</b> | <b>0.1772*</b>  | 0.0949                   | <b>0.1529*</b> | 0.0282         | 0.0557                     | 0.1124         | -0.0122        |
| Pre-pregnancy BMI    | 0.0673                         | 0.1435         | -0.0073         | <b>0.1284*</b>           | <b>0.2062*</b> | 0.022          | <b>0.1453*</b>             | <b>0.2160*</b> | 0.0533         |
| Net Weight Gain      | <b>0.1398*</b>                 | <b>0.2350*</b> | 0.0166          | <b>0.1574*</b>           | <b>0.2480*</b> | 0.046          | <b>0.1437*</b>             | <b>0.2336*</b> | 0.0403         |
| Placental Weight     | <b>0.6543*</b>                 | <b>0.6906*</b> | <b>0.5950*</b>  | <b>0.6107*</b>           | <b>0.6748*</b> | <b>0.5044*</b> | <b>0.5514*</b>             | <b>0.6271*</b> | <b>0.4369*</b> |
| Free Fatty Acids     | 0.1211                         | 0.0745         | 0.2422          | 0.1341                   | 0.1022         | 0.1969         | 0.1314                     | 0.1196         | 0.1492         |
| Triglycerides        | 0.119                          | 0.1712         | 0.1012          | <b>0.1885*</b>           | 0.2103         | 0.1795         | <b>0.1959*</b>             | <b>0.2221*</b> | 0.1766         |
| Insulin              | 0.044                          | 0.047          | 0.0444          | <b>0.1357*</b>           | 0.1265         | 0.1403         | <b>0.1562*</b>             | 0.1446         | <b>0.1708*</b> |
| Glucose              | 0.0848                         | 0.0696         | 0.08            | 0.0513                   | 0.0248         | 0.065          | 0.0319                     | 0.0113         | 0.0515         |
| HOMA-IR              | 0.0546                         | 0.0472         | 0.0603          | <b>0.1285*</b>           | 0.1066         | 0.1482         | <b>0.1435*</b>             | 0.1207         | <b>0.1721*</b> |
| IL6                  | 0.0273                         | -0.0195        | 0.1162          | <b>0.1457*</b>           | 0.1119         | 0.1988         | <b>0.1873*</b>             | 0.1642         | <b>0.2155*</b> |
| CRP                  | -0.0946                        | 0.0307         | <b>-0.2650*</b> | -0.0087                  | 0.1106         | -0.2052        | 0.0297                     | 0.136          | -0.1632        |

HOMA-IR: homeostasis model assessment-estimated insulin resistance; CRP: C-reactive protein; IL6: interleukin-6. Table displays Spearman's correlation coefficients. \*P<0.05 by Spearman correlation

Supplementary Table 2. Semipartial correlation coefficients for maternal factors that affected body composition in all infants at birth based on stepwise regression modeling

| All (without plasma metabolites) |                   |                 |         | All (with plasma metabolites) |                   |                 |         |
|----------------------------------|-------------------|-----------------|---------|-------------------------------|-------------------|-----------------|---------|
|                                  | Factor            | sr <sup>2</sup> | P value |                               | Factor            | sr <sup>2</sup> | P value |
| <u>LBM</u>                       |                   |                 |         | <u>LBM</u>                    |                   |                 |         |
| n=317                            | Placental Weight  | 0.37            | <0.0001 | n=317                         | Placental Weight  | 0.37            | <0.0001 |
|                                  | Gestational Age   | 0.04            | <0.0001 |                               | Gestational Age   | 0.04            | <0.0001 |
|                                  | Maternal Height   | 0.02            | 0.001   |                               | Maternal Height   | 0.02            | 0.001   |
|                                  | Net Weight Gain   | 0.01            | 0.008   |                               | Net Weight Gain   | 0.01            | 0.008   |
|                                  | Age               | 0.008           | 0.028   |                               | Age               | 0.008           | 0.028   |
| <u>FM</u>                        |                   |                 |         | <u>FM</u>                     |                   |                 |         |
| n=317                            | Placental Weight  | 0.37            | <0.0001 | n=121                         | Placental Weight  | 0.40            | <0.0001 |
|                                  | Gestational Age   | 0.02            | 0.003   |                               | Gestational Age   | 0.02            | 0.015   |
|                                  | Net weight gain   | 0.02            | 0.003   |                               |                   |                 |         |
|                                  | Pre-pregnancy BMI | 0.01            | 0.017   |                               |                   |                 |         |
| <u>% Fat</u>                     |                   |                 |         | <u>% Fat</u>                  |                   |                 |         |
| n=317                            | Placental Weight  | 0.30            | <0.0001 | n=121                         | Placental Weight  | 0.32            | <0.0001 |
|                                  | Gestational Age   | 0.02            | 0.003   |                               | Gestational Age   | 0.02            | 0.002   |
|                                  | Pre-pregnancy BMI | 0.01            | 0.017   |                               | Pre-pregnancy BMI | 0.007           | 0.066   |
|                                  | Net weight gain   | 0.009           | 0.034   |                               |                   |                 |         |

Sr<sup>2</sup>: Semipartial correlation coefficients estimate the degree of variance explained by each factor

Supplementary Table 3. Semipartial correlation coefficients for maternal factors (*excluding maternal plasma metabolites*) that affected body composition in male and female infants at birth based on stepwise regression modeling

| Males        |                   |                 |         | Females      |                  |                 |         |
|--------------|-------------------|-----------------|---------|--------------|------------------|-----------------|---------|
|              | Factor            | sr <sup>2</sup> | P value |              | Factor           | sr <sup>2</sup> | P value |
| <u>LBM</u>   |                   |                 |         | <u>LBM</u>   |                  |                 |         |
| n=175        | Placental Weight  | 0.39            | <0.0001 | n=143        | Placental Weight | 0.34            | <0.0001 |
|              | Gestational Age   | 0.04            | <0.0001 |              | Gestational Age  | 0.05            | <0.0001 |
|              | Net weight gain   | 0.03            | 0.001   |              | Maternal Height  | 0.03            | 0.009   |
|              | Maternal Height   | 0.02            | 0.003   |              |                  |                 |         |
| <u>FM</u>    |                   |                 |         | <u>FM</u>    |                  |                 |         |
| n=175        | Placental Weight  | 0.35            | <0.0001 | n=145        | Placental Weight | 0.34            | <0.0001 |
|              | Net weight gain   | 0.04            | <0.0001 |              |                  |                 |         |
|              | Pre-pregnancy BMI | 0.02            | 0.009   |              |                  |                 |         |
|              | Gestational Age   | 0.02            | 0.020   |              |                  |                 |         |
| <u>% Fat</u> |                   |                 |         | <u>% Fat</u> |                  |                 |         |
| n=175        | Placental Weight  | 0.31            | <0.0001 | n=145        | Placental Weight | 0.25            | <0.0001 |
|              | Net weight gain   | 0.03            | 0.004   |              |                  |                 |         |
|              | Gestational Age   | 0.02            | 0.013   |              |                  |                 |         |
|              | Pre-pregnancy BMI | 0.02            | 0.013   |              |                  |                 |         |

Sr<sup>2</sup>: Semipartial correlation coefficients estimate the degree of variance explained by each factor
